# Supplementary material for: Outcomes of Etanercept Treatment for Steroid-Refractory Acute Graft-Versus-Host Disease in Adult and Pediatric Patients: A Retrospective Single-Center Cohort Study
Source: Research Square preprint supplement (doi:10.21203/rs.3.rs-6528634/v1), 2025-05-07
Supplement: Supplementary file 1 [file 7060e913ba5734231a7a1622.docx]

**Supplementary Table 1. Baseline and transplant characteristics of adult patients treated with ET or BAT.**

| **Variable** | **ET**  **(N=15)** | **BAT**  **(N=59)** | | ***P* value** | |
| --- | --- | --- | --- | --- | --- |
| **Age at transplantation, yr – median (IQR)** | 32.9 (23.4-58.6) | 43.8 (32.2-55.6) | | 0.139 | |
| **Male sex – no. (%)** | 10 (66.7) | 43 (72.9) | | 0.750 | |
| **Primary malignant disease – no. (%)** | 13 (86.7) | 57 (96.6) | | 0.181 | |
| **CR of malignant disease at alloHSCT – no. (%)** | 9 (69.2) | 30 (52.6) | | 0.460 | |
| **Age of donor, yr – median (IQR)** | 34.0 (20.6-41.8) | 33.3 (27-50) | | 0.250 | |
| **Gender (donor/ recipient) – no. (%)** | | | | | |
| **M/M** | 9 (60.0) | 32 (54.3) | | 0.172 | |
| **M/F** | 1 (6.7) | 11 (18.6) | |
| **F/F** | 4 (26.6) | 5 (8.5) | |
| **F/M** | 1 (6.7) | 11 (18.6) | |
| **HLA Match – no. (%)** | 11 (73.3) | 47 (79.7) | | 0.726 | |
| **ABO match – no. (%)** | | | | | |
| **Match** | 8 (53.3) | 27 (45.8) | | 0.691 | |
| **Minor mismatch** | 4 (26.7) | 13 (22.0) | |
| **Major mismatch** | 1 (6.7) | 12 (22.0) | |
| **Bidirectional** | 2 (13.3) | 7 (10.2) | |
| **CMV serostatus (donor/ recipient) – no. (%)** | | | | | |
| **+/+** | 9 (60.0) | 43 (75.4) | | 0.381 | |
| **-/+** | 4 (26.6) | 6 (10.5) | |
| **+/-** | 1 (6.7) | 3 (5.3) | |
| **-/-** | 1 (6.7) | 5 (8.8) | |
| **MA conditioning regimen – no. (%)** | 12 (80.0) | 38 (64.4) | | 0.358 | |
| **ATG – no. (%)** | 7 (46.7) | 24 (40.7) | | 0.675 | |
| **Double GvHD prophylaxis – no. (%)** | 14 (93.3) | 50 (84.7) | | 0.676 | |
| **Source of graft – no. (%)** | | | | | |
| **PBSC** | 14 (93.3) | 53 (89.8) | | 1.0 | |
| **BM** | 1 (6.7) | 4 (6.8) | |
| **CB** | 0 (0.00) | 2 (3.4) | |
| **Time from alloHSCT to aGvHD, days – median (IQR)** | 23 (18-52) | | 35 (20-57) | | 0.280 |
| **aGvHD grade at diagnosis – no. (%)** | | | | | |
| **I** | 0 (0.0) | | 2 (3.4) | | **0.011** |
| **II** | 6 (40.0) | | 5 (8.5) | |
| **III** | 4 (26.7) | | 37 (62.7) | |
| **IV** | 5 (33.3) | | 15 (25.4) | |
| **aGvHD organ involvement at diagnosis – no. (%)** | | | | | |
| **GI** | 12 (80,0) | | 56 (94.9) | | 0.093 |
| **Liver** | 6 (40.0) | | 11 (18.6) | | 0.079 |
| **Skin** | 11 (73.3) | | 30 (50.8) | | 0.151 |
| **No of treatment lines for SR-aGvHD – median (IQR)** | 5 (5-7) | | 4 (3-4) | | 0.435 |

aGvHD, acute graft-versus-host disease; alloHSCT, allogeneic hematopoietic stem cell transplantation; ATG, anti-thymocyte globulin; BM, bone marrow; CB, cord blood; CMV, cytomegalovirus; CR, complete response; ET, etanercept; GI, gastrointestinal; HLA, human leukocyte antigens; MA, myeloablative; PBSC, peripheral blood stem cells; SR-aGvHD, steroid refractory acute graft-versus-host disease; yr, years.

**Supplementary Table 2. Baseline and transplant characteristics of pediatric patients treated with ET or BAT.**

| **Variable** | **ET**  **(N=31)** | **BAT**  **(N=18)** | | ***P* value** | |
| --- | --- | --- | --- | --- | --- |
| **Age at transplantation, yr – median (IQR)** | 5.9 (1.8-9.9) | 9.9 (6.7-12.5) | | **0.035** | |
| **Male sex – no. (%)** | 17 (54.8) | 12 (66.7) | | 0.417 | |
| **Malignant primary disease – no. (%)** | 9 (29.0) | 12 (66.7) | | 0.010 | |
| **Status of primary malignant disease at alloHSCT – no. (%)** | | | | | |
| **CR of malignant disease at alloHSCT – no. (%)** | 7 (77.8) | 9 (75.0) | | 1.0 | |
| **Age of donor, yr – median (IQR)** | 25.0 (20.8-36.7) | 26.4 (19.3-31.8) | | 0.841 | |
| **Gender (donor/ recipient) – no. (%)** | | | | | |
| **M/M** | 11 (35.5) | 5 (27.7) | | 0.555 | |
| **M/F** | 8 (25.9) | 3 (16.7) | |
| **F/F** | 6 (19.3) | 3 (16.7) | |
| **F/M** | 6 (19.3) | 7 (38.9) | |
| **HLA Match** | 18 (58.1) | 7 (38.9) | | 0.195 | |
| **ABO match – no. (%)** | | | | | |
| **Match** | 11 (35.5) | 8 (44.4) | | 0.733 | |
| **Minor mismatch** | 8 (25.9) | 3 (16.7) | |
| **Major mismatch** | 6 (19.3) | 5 (27.7) | |
| **Bidirectional** | 6 (19.3) | 2 (11.1) | |
| **CMV serostatus (donor/ recipient) – no. (%)** | | | | | |
| **+/+** | 16 (53.3) | 7 (43.7) | | 0.709 | |
| **-/+** | 8 (26.7) | 7 (43.7) | |
| **+/-** | 3 (10.0) | 1 (6.3) | |
| **-/-** | 3 (10.0) | 1 (6.3) | |
| **MA conditioning regimen – no. (%)** | 31 (100.0) | 16 (88.9) | | 0.130 | |
| **ATG – no. (%)** | 23 (74.2) | 9 (50.0) | | 0.086 | |
| **Double GvHD prophylaxis – no. (%)** | 31 (100.0) | 12 (66.7) | | **0.001** | |
| **Source of graft – no. (%)** | | | | | |
| **PBSC** | 7 (22.6) | 10 (55.5) | | **0.049** | |
| **BM** | 23 (74.2) | 7 (38.9) | |
| **CB** | 1 (3.2) | 1 (5.6) | |
| **Time from alloHSCT to aGvHD, days – median (IQR)** | 25 (14-38) | | 16.5 (12-28) | | 0.250 | |
| **aGvHD grade at diagnosis – no. (%)** | | | | | | |
| **I** | 1 (3.2) | | 0 (0.0) | | 0.718 | |
| **II** | 0 (0.0) | | 0 (0.0) | |
| **III** | 15 (48.4) | | 11 (61.1) | |
| **IV** | 15 (48.4) | | 7 (38.9) | |
| **aGvHD organ involvement at diagnosis – no. (%)** | | | | | | |
| **GI** | 26 (83.9) | | 17 (94.4) | | 0.393 | |
| **Liver** | 10 (32.3) | | 6 (33.3) | | 0.938 | |
| **Skin** | 26 (83.9) | | 17 (94.4) | | 0.393 | |
| **Treatment lines for SR-aGvHD – median (IQR)** | 4 (3-5) | | 3 (2-4.5) | | **0.057** | |

aGvHD, acute graft-versus-host disease; alloHSCT, allogeneic hematopoietic stem cell transplantation; ATG, anti-thymocyte globulin; BM, bone marrow; CB, cord blood; CMV, cytomegalovirus; CR, complete response; ET, etanercept; GI, gastrointestinal; HLA, human leukocyte antigens; MA, myeloablative; PBSC, peripheral blood stem cells; SR-aGvHD, steroid refractory acute graft-versus-host disease; yr, years.

**Supplementary Table 3. Baseline and transplant characteristics of adult and pediatric patients in the ET arm.**

| **Variable** | **Adults**  **(N=15)** | **Pediatrics**  **(N=31)** | ***P* value** |
| --- | --- | --- | --- |
| **Age at transplantation, years – median (IQR)** | 32.9 (23.4-58.6) | 5.9 (1.8-9.9) | **<0.0001** |
| **Male sex – no. (%)** | 10 (66.7) | 17 (54.8) | 0.445 |
| **Malignant primary disease – no. (%)** | 13 (86.7) | 9 (29.0) | **0.0004** |
| **CR of malignant disease at alloHSCT – no. (%)** | 9 (69.2) | 7 (77.8) | 1.0 |
| **Age of donor, years – median (IQR)** | 34.0 (20.6-41.8) | 25.0 (20.8-36.7) | **<0.0001** |
| **Gender (donor/ recipient) – no. (%)** | | | |
| **M/M** | 9 (60.0) | 11 (35.5) | 0.234 |
| **M/F** | 1 (6.7) | 8 (25.9) |
| **F/F** | 4 (26.6) | 6 (19.3) |
| **F/M** | 1 (6.7) | 6 (19.3) |
| **HLA Match – no. (%)** | 11 (73.3) | 18 (58.1) | 0.352 |
| **ABO match – no. (%)** | | | |
| **Match** | 8 (53.3) | 11 (35.5) | 0.656 |
| **Minor mismatch** | 4 (26.7) | 8 (25.9) |
| **Major mismatch** | 1 (6.7) | 6 (19.3) |
| **Bidirectional** | 2 (13.3) | 6 (19.3) |
| **CMV serostatus (donor/ recipient) – no. (%)** | | | |
| **+/+** | 9 (60.0) | 16 (53.3) | 1.0 |
| **-/+** | 4 (26.6) | 8 (26.7) |
| **+/-** | 1 (6.7) | 3 (10.0) |
| **-/-** | 1 (6.7) | 3 (10.0) |
| **MA conditioning regimen – no. (%)** | 12 (80.0) | 31 (100.0) | **0.001** |
| **ATG – no. (%)** | 7 (46.7) | 23 (74.2) | 0.1 |
| **Double GvHD prophylaxis – no. (%)** | 14 (93.3) | 31 (100.0) | 0.326 |
| **Source of graft – no. (%)** | | | |
| **PBSC** | 14 (93.3) | 7 (22.6) | **<0.0001** |
| **BM** | 1 (6.7) | 23 (74.2) |
| **CB** | 0 (0.00) | 1 (3.2) |

| **Time from alloHSCT to aGvHD, days – median (IQR)** | 23 (18-52) | 25 (14-38) | 0.542 |
| --- | --- | --- | --- |
| **aGvHD grade at diagnosis – no. (%)** | | | |
| **I** | 0 (0.0) | 1 (3.2) | **0.003** |
| **II** | 6 (40.0) | 0 (0.0) |
| **III** | 4 (26.7) | 15 (48.4) |
| **IV** | 5 (33.3) | 15 (48.4) |
| **aGvHD organ involvement at diagnosis – no. (%)** | | | |
| **GI** | 12 (80,0) | 26 (83.9) | 0.745 |
| **Liver** | 6 (40.0) | 10 (32.3) | 0.605 |
| **Skin** | 11 (73.3) | 26 (83.9) | 0.398 |
| **Treatment lines pre-ET for SR-aGvHD – median (IQR)** | 4 (3-5) | 1.5 (1-4) | **<0.01** |

aGvHD, acute graft-versus-host disease; alloHSCT, allogeneic hematopoietic stem cell transplantation; ATG, anti-thymocyte globulin; BM, bone marrow; CB, cord blood; CMV, cytomegalovirus; CR, complete response; ET, etanercept; GI, gastrointestinal; HLA, human leukocyte antigens; MA, myeloablative; PBSC, peripheral blood stem cells; SR-aGvHD, steroid refractory acute graft-versus-host disease; yr, years.
